# Supplementary material
Source: PubMed Central journal article supplement (PMC6344613)
Supplement: c0b6263f2c5a90cc213f121229d13d62_AEM.01896-18-s0001.pdf [file c0b6263f2c5a90cc213f121229d13d62_AEM.01896-18-s0001.pdf]

1 Forced Recycling of AMA1-based Genome-Editing Plasmid Allows for Efficient  
2 Multiple Gene Deletion/Integration in The Industrial Filamentous Fungus *Aspergillus*  
3 *oryzae*  
4  
5 Takuya Katayama<sup>a,b</sup>, Hidetoshi Nakamura<sup>a</sup>, Zhang Yue<sup>a</sup>, Arnaud Pascal<sup>a</sup>, Wataru Fujii<sup>c</sup>,  
6 Jun-ichi Maruyama<sup>a,b,#</sup>  
7 <sup>a</sup>Department of Biotechnology, The University of Tokyo, 1-1-1 Yayoi, Bunkyo-ku,  
8 Tokyo 113-8657, Japan  
9 <sup>b</sup>Collaborative Research Institute for Innovative Microbiology, The University of  
10 Tokyo, 1-1-1 Yayoi, Bunkyo-ku, Tokyo 113-8657, Japan  
11 <sup>c</sup>Department of Animal Resource Sciences, The University of Tokyo, 1-1-1 Yayoi,  
12 Bunkyo-ku, Tokyo 113-8657, Japan

13 **Construction of the genome editing plasmids containing sgRNA-expression cassettes**  
14 **and the donor plasmids**

15 **Autonomously replicating plasmids for genome editing:** The genome  
16 editing plasmids ppAsAC9gwA, ppAsAC9gyA, and ppAsAC9gpG for mutagenesis of  
17 the *wA*, *yA*, and *pyrG* genes were constructed as follows: DNA fragments containing the  
18 *U6* promoter (*PU6*), sgRNA encoding sequences, and the *U6* terminator (*TU6*) were  
19 amplified from the plasmids pUNAFNC9gwA1, pUNAFNC9gyA, and pUNAFNC9gpG  
20 (1), respectively, using a primer set, SmaIIF1-PU6F and SmaIIF2-TU6-R, and were  
21 ligated with *SmaI*-digested ppAsAcas9, yielding ppAsAC9gwA, ppAsAC9gyA, and  
22 ppAsAC9gpG, respectively.

23 **Recycling plasmids for genome editing:** The genome editing plasmid  
24 ppAsATC9a2gwA7 for mutagenesis of the *wA* gene was constructed as follows: the *PU6*  
25 was amplified from the plasmid ppAsAC9gwA using a primer set, SmaIIF1-PU6F and  
26 PU6-gwA7R. A DNA fragment containing sgRNA-encoding sequence and *TU6* was  
27 amplified from the plasmid ppAsAC9gwA using a primer set, TU6-gwA7F and  
28 pAsATC9a2-TU6-R. These DNA fragments were fused using a primer set, SmaIIF1-  
29 PU6F and pAsATC9a2-TU6-R, and the fused fragment was ligated with *SmaI*-digested  
30 ppAsATC9a2, yielding ppAsATC9a2gwA7.

31 The genome editing plasmid ppAsATC9a2gpG for mutagenesis of the *pyrG*  
32 gene was constructed as follows: A DNA fragments containing *PU6*, sgRNA encoding  
33 sequence, and *TU6* were amplified from the plasmid ppAsAC9gpG using a primer set,  
34 SmaIIF1-PU6F and pAsATC9a2-TU6-R, and was ligated with *SmaI*-digested  
35 ppAsATC9a2, yielding ppAsATC9a2gpG.

36           The genome editing plasmid ppAsATC9a2gniaD for mutagenesis of the *niaD*  
37 gene was constructed as follows: the *PU6* was amplified from the plasmid ppAsAC9gwA  
38 using a primer set, SmaIIF1-PU6F and gniaD-PU6R. A DNA fragment containing  
39 sgRNA-encoding sequence and *TU6* was amplified from ppAsAC9gwA using a primer  
40 set, gniaD-TU6F and pAsATC9a2-TU6-R. These DNA fragments were fused using a  
41 primer set, SmaIIF1-PU6F and pAsATC9a2-TU6-R, and the fused fragment was ligated  
42 with *SmaI*-digested ppAsATC9a2, yielding ppAsATC9a2gniaD.

43           **Genome editing plasmids for double gene mutagenesis:** The genome editing  
44 plasmid pRGESwABnD for double mutagenesis of the *wA* and *niaD* genes was  
45 constructed as follows: a DNA fragment containing *PU6*, sgRNA encoding sequence, and  
46 *TU6* was amplified from the plasmid ppAsATC9a2gniaD using a primer set, Bst-PU6F  
47 and Bst-TU6R, and was ligated with *Bst1107I*-digested ppAsATC9a2gwA7, yielding  
48 pRGESwABnD.

49           The genome editing plasmid pRGESpGBwA for double mutagenesis of the  
50 *pyrG* and *wA* genes was constructed as follows: a DNA fragment containing *PU6*, sgRNA  
51 encoding sequence, and *TU6* was amplified from the plasmid pUNAFNC9gwA1 using  
52 primer set, Bst-PU6F and Bst-TU6R, and was ligated with *Bst1107I*-digested  
53 ppAsATC9a2gpG, yielding pRGESpGBwA.

54           **Genome editing plasmid and donor plasmid for deletion at the *wA* locus:**  
55 The genome editing plasmid pRGEgwAup for DSB at the upstream of *wA* was  
56 constructed as follows: the DNA fragment containing sgRNA encoding sequence and  
57 *TU6* was amplified from the plasmid ppAsATC9a2gwA7 using a primer set, pAsAIF-  
58 gRNAF and pAsATC9a2-TU6-R, and was ligated with *SmaI*-digested ppAsATC9a2,  
59 yielding pRGE-gRT6. The *PU6* was amplified from ppAsATC9a2gwA7 using a primer

60 set, SmaIIF1-PU6F and gwAup-PU6-R, and was ligated with *SmaI*-digested pRGE-gRT6,  
61 yielding pRGEgwAup.

62 The donor plasmid pwAupDN for deletion of 5' region of the *wA* gene was  
63 constructed as follows: the upstream region of the *wA* promoter was amplified from the  
64 genome DNA of the strain RIB40 using a primer set, 19IF-wADN-F and wADN-5R. A  
65 region within the *wA* ORF was amplified from the genome DNA of the strain RIB40  
66 using a primer set, wADN-3F and 19IFwADN-R. These two DNA fragments were fused  
67 using a primer set, 19IF-wADN-F and 19IFwADN-R, and the fused fragment was ligated  
68 with *SmaI*-digested pUC19, yielding pwAupDN.

69 **Genome editing plasmid and donor plasmid for deletion at the *niaD* locus:**

70 The genome editing plasmid pRGEgnDdown for DSB at the downstream of *niaD* was  
71 constructed as follows: the *PU6* was amplified from the plasmid ppAsAC9gwA using a  
72 primer set, SmaIIF1-PU6F and gnD-PU6R. A DNA fragment containing sgRNA  
73 encoding sequence and *TU6* was amplified from ppAsAC9gwA using a primer set, gnD-  
74 TU6F and pAsATC9a2-TU6-R. These DNA fragments were fused using a primer set,  
75 SmaIIF1-PU6F and pAsATC9a2-TU6-R, and the fused fragment was ligated with *SmaI*-  
76 digested ppAsATC9a2, yielding pRGEgnDdown.

77 The donor plasmid pnDdownDN for deletion of 3' region of the *niaD* gene was  
78 constructed as follows: A region within the *niaD* ORF was amplified from the genome  
79 DNA of the strain RIB40 using a primer set, 19IF-nDdownDN5F and nDdownDN5R.  
80 The downstream region of the *niaD* terminator was amplified from the genome DNA of  
81 the strain RIB40 using a primer set, nDdownDN3F and 19IF-nDdownDN3R. These two  
82 DNA fragments were fused using a primer set, 19IF-nDdownDN5F and 19IF-

83 nDdownDN3R, and the fused fragment was ligated with *SmaI*-digested pUC19, yielding  
84 pnDdownDN.

85 **Genome editing plasmid for double gene deletion/integration:** The genome  
86 editing plasmid pRGEgwAupgnDdown for DSB at the upstream of *wA* and the  
87 downstream of *niaD* was constructed as follows: a DNA fragment containing *PU6*,  
88 sgRNA encoding sequence, and *TU6* was amplified from the plasmid pRGEgnDdown  
89 using a primer set, Bst-PU6F and Bst-TU6R, and was ligated with *Bst1107I*-digested  
90 pRGEgwAup, yielding pRGEgwAupgnDdown.

91 **Donor plasmid for integrating *egfp*-expression cassette into the *wA* locus:**  
92 The donor plasmid pwAupEGFP was constructed as follows: the *egfp* gene was amplified  
93 from pg3'E (2) using a primer set, PamyB-C-linker-F2, and AIF-cEGFP, and was  
94 ligated with *SmaI*-digested pUtNAN, yielding pUt-C-EGFP. A DNA fragment containing  
95 *PamyB*, *egfp*, and *TamyB* was amplified from the plasmid pUt-C-EGFP using a primer  
96 set, wADN-PamyBF and wADN-TamyBR, and was ligated with *SmaI*-digested  
97 pwAupDN, yielding pwAupEGFP.

98 **Donor plasmid for integrating *mDsred*-expression cassette into the *niaD***  
99 **locus:** The donor plasmid pnDdownDR was constructed as follows: the *mDsred* gene was  
100 amplified from the plasmid pg3'DRM-CF (3) using a primer set, PamyB-C-linker-F2, and  
101 TamyB-mDsRedR, and was ligated with *SmaI*-digested pUtNAN, yielding pUt-C-  
102 mDsred. A DNA fragment containing *PamyB*, *mDsred*, and *TamyB* was amplified from  
103 the plasmid pUt-C-mDsred using a primer set, nDdDN-PamyBF and nDdDN-TamyBR,  
104 and ligated with *SmaI*-digested pnDdownDN, yielding pnDdownDR.

105

106 **Quantitative PCR:** The copy number of the integrated donor DNA was analyzed using  
107 TB Green™ *Premix Ex Taq*™ II (Tli RNaseH Plus) (TaKaRa) and Thermal Cycler Dice  
108 Real Time System (TaKaRa).

109

110 **Western blot analysis:** Preparation of cell extract, SDS-PAGE, and Western blot  
111 analysis were performed as described previously (4). Lysis buffer (50 mM Tris-HCl,  
112 pH7.5, 150 mM NaCl, and 1% NP-40) was used for preparation of cell extract.  
113 Polyacrylamide gel (12%) was used for SDS-PAGE. For detecting EGFP, Living Colors  
114 A.V. monoclonal antibody (Clontech) and peroxidase-labeled anti-mouse IgG (H+L)  
115 (Vector Laboratories, Burlingame, CA) as a primary antibody and secondary antibody,  
116 respectively.

117

118 REFERENCES

- 119 1. Katayama T, Tanaka Y, Okabe T, Nakamura H, Fujii W, Kitamoto K,  
120 Maruyama J. 2016. Development of a genome editing technique using the CRISPR/Cas9  
121 system in the industrial filamentous fungus *Aspergillus oryzae*. *Biotechnol Lett* 38: 637-  
122 42.
- 123 2. Mabashi K, Kikuma T, Maruyama J, Arioka M, Kitamoto K. 2006.  
124 Development of a versatile expression plasmid construction system for *Aspergillus*  
125 *oryzae* and its application to visualization of mitochondria. *Biosci Biotechnol Biochem*  
126 70: 1882-9.
- 127 3. Escano CS, Juvvadi PR, Jin FJ, Takahashi T, Koyama Y, Yamashita S,  
128 Maruyama J, Kitamoto K. 2009. Disruption of the *Aopex11-1* gene involved in  
129 peroxisome proliferation leads to impaired Woronin body formation in *Aspergillus*  
130 *oryzae*. *Eukaryot Cell* 8: 296-305.
- 131 4. Okabe T, Katayama T, Mo T, Mori N, Jin FJ, Fujii I, Iwashita K, Kitamoto K,  
132 Maruyama J. 2018. BiFC-based visualisation system reveals cell fusion morphology and  
133 heterokaryon incompatibility in the filamentous fungus *Aspergillus oryzae*. *Sci Rep* 8:  
134 2922.

## wA mutation pattern

|           |                                                            |
|-----------|------------------------------------------------------------|
| Indel     |                                                            |
| Wild type | TTGATTCTAGGCTGTCTAAGAGCCATAAGCCGGTGAGGGCGCAAATCCATGGTCCTTA |
| -7 bps    | TTGATTCTAGGCTGTCTAAGAG-----CCGGTGAGGGCGCAAATCCATGGTCCTTA   |
| -1 bps    | TTGATTCTAGGCTGTCTAAGAGCCAT-AGCCGGTGAGGGCGCAAATCCATGGTCCTTA |
| -24 bps   | TTGATTCTAGGCTGTCTAAGAGCCAT-----GGTCCTTA                    |
| -8 bps    | TTGATTCTAGGCTGTCTAAGAG-----CGGTGAGGGCGCAAATCCATGGTCCTTA    |
| -6 bps    | TTGATTCTAGGCTGTCTAAGAGCCA-----GGTGAGGGCGCAAATCCATGGTCCTTA  |
| -9 bps    | TTGATTCTAGGCTGTCTAAGAGC-----GTGAGGGCGCAAATCCATGGTCCTTA     |

## yA mutation pattern

|             |                                                              |
|-------------|--------------------------------------------------------------|
| Indel       |                                                              |
| Wild type   | GATGTCCCGCGCCAAATGATTCTCACTAATGGGAAGTATCCAGGGCCTGACTTGGTGTT  |
| -10 bps     | GATGTCCCGCGCCAAATGATTCT-----AAGTATCCAGGGCCTGACTTGGTGTT       |
| -12 bps     | GATGTCCCGCGCCAAATGATTCTCA-----ATCCAGGGCCTGACTTGGTGTT         |
| -12 bps     | GATGTCCCGCGCCAAA-----ATGGGAAGTATCCAGGGCCTGACTTGGTGTT         |
| -13 bps     | GATGTCCCGCGCCAAA-----TGGGAAGTATCCAGGGCCTGACTTGGTGTT          |
| -11 bps     | GATGTCCCGCGCCAAATG-----TGGGAAGTATCCAGGGCCTGACTTGGTGTT        |
| +1 bp       | GATGTCCCGCGCCAAATGATTCTCACTTAATGGGAAGTATCCAGGGCCTGACTTGGTGTT |
| -2 bps      | GATGTCCCGCGCCAAATGATTCTCA--AATGGGAAGTATCCAGGGCCTGACTTGGTGTT  |
| Large indel | Large deletion and Insertion from AO090102000647 locus       |
| Large indel | Large deletion and Insertion from AO090012000538 locus       |

## pyrG mutation pattern

|           |                                                           |
|-----------|-----------------------------------------------------------|
| Indel     |                                                           |
| Wild type | CGGCCGAGGACTTCCCTACGGCTCCGAGAGGGGCCTTTTGATCCTTGCGGAGATGA  |
| -12 bps   | CGGCCGAGGACTTC-----GAGAGGGGCCTTTTGATCCTTGCGGAGATGA        |
| -26 bps   | CGGCCGAGGACTTCCCTACGGCTC-----AGATGA                       |
| +1 bp     | CGGCCGAGGACTTCCCTACGGCTCCCGAGAGGGGCCTTTTGATCCTTGCGGAGATGA |
| -9 bps    | CGGCCGAGGACTTCCCT-----GAGAGGGGCCTTTTGATCCTTGCGGAGATGA     |

FIG S1 Mutational patterns for wA, yA, and pyrG in the *A. oryzae* wild strain RIB40. Solid underlines, protospacer sequence; dotted underlines, PAM sequences; hyphens, deleted nucleotides; red characters, inserted nucleotides.



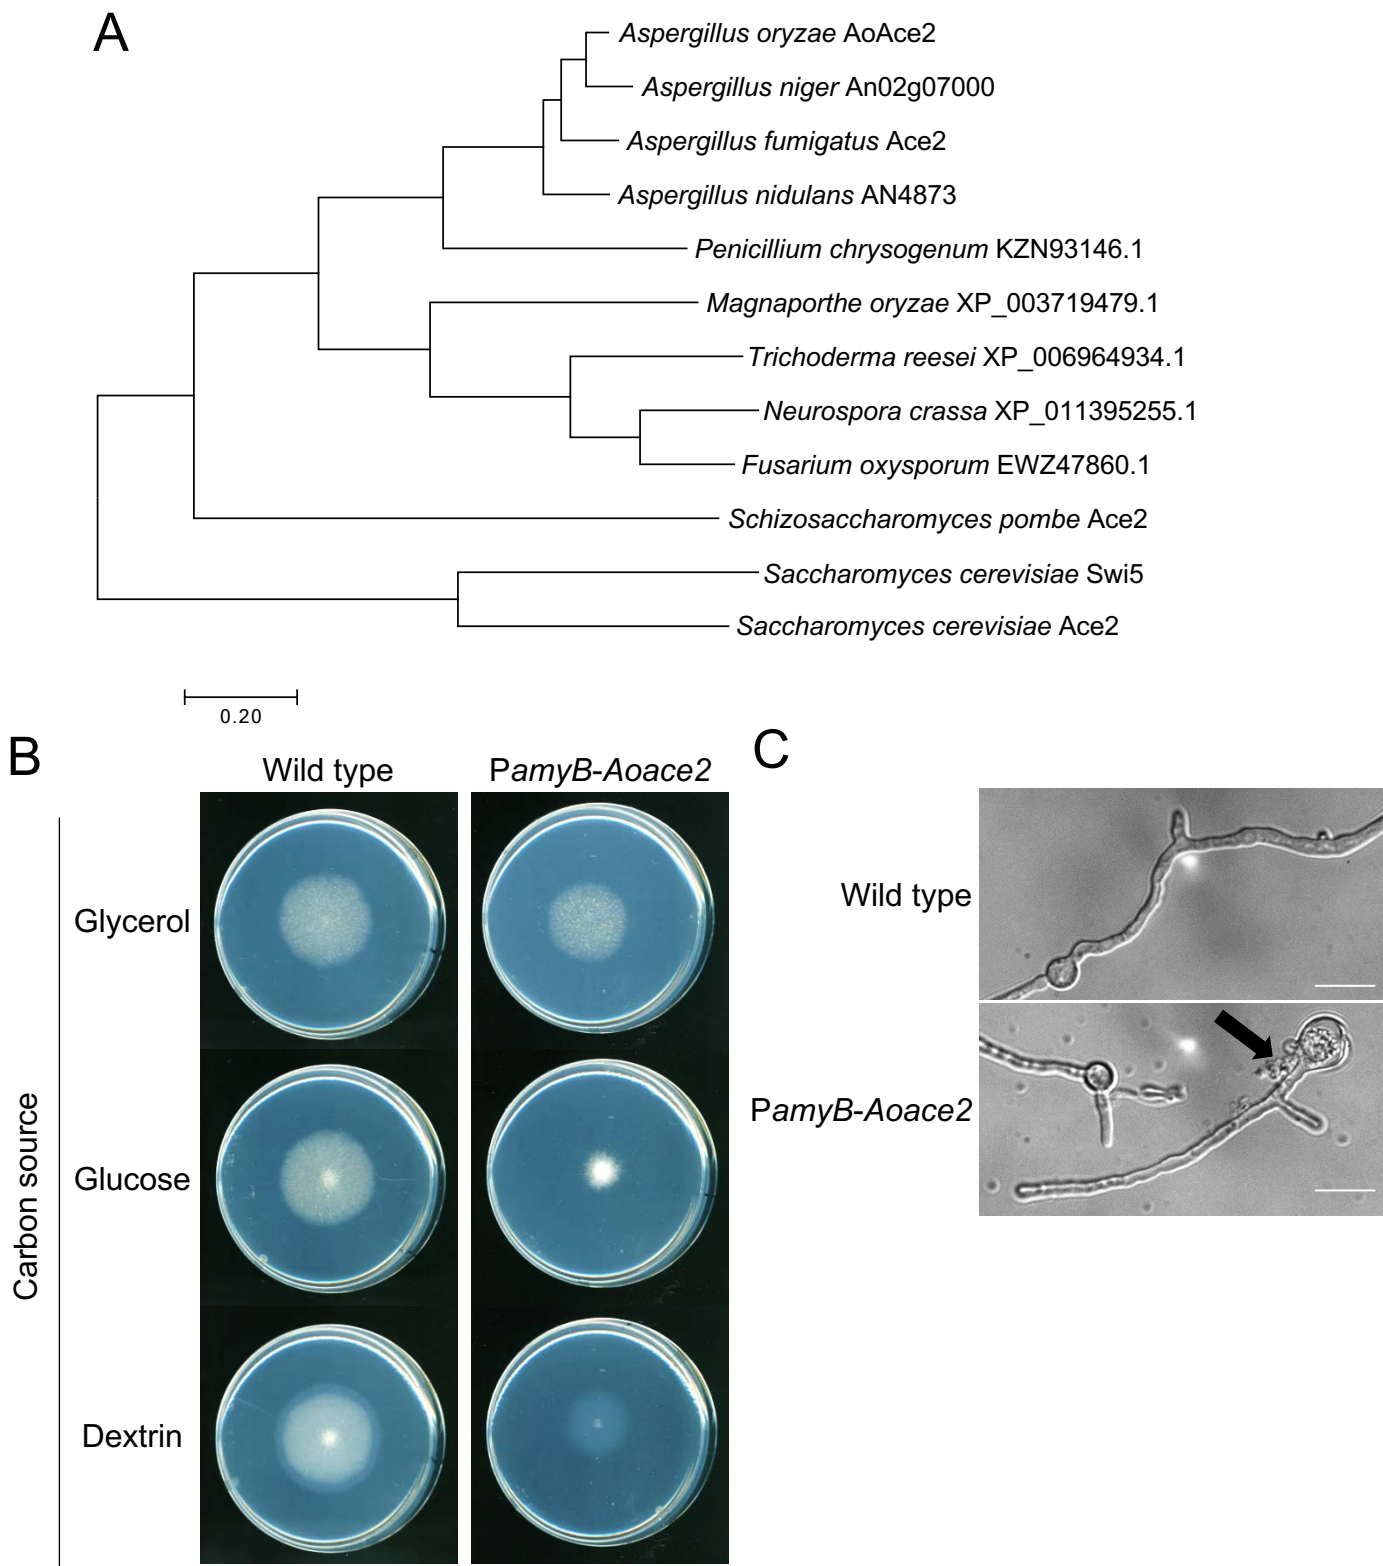

FIG S2 Growth of *A. oryzae* strain expressing *Aoace2* under the control of *PamyB*. (A) Phylogenetic tree of the *AoAce2* orthologues. (B) Conidial suspension ( $10^4$  conidia in  $5 \mu\text{L}$ ) of each strain was spotted onto the CD agar medium containing the indicated carbon source and 0.15% methionine, and incubated for 4 d at  $30^\circ\text{C}$ . Although halo was observed on the CD medium containing dextrin, the strain expressing *Aoace2* hardly grew on the medium. (C) Conidia ( $10^5$ ) were inoculated in the CD medium containing dextrin as sole carbon source and 0.15% methionine, and incubated for 20 h at  $30^\circ\text{C}$ . Arrow indicates cell lysis. Bars:  $5 \mu\text{m}$ .

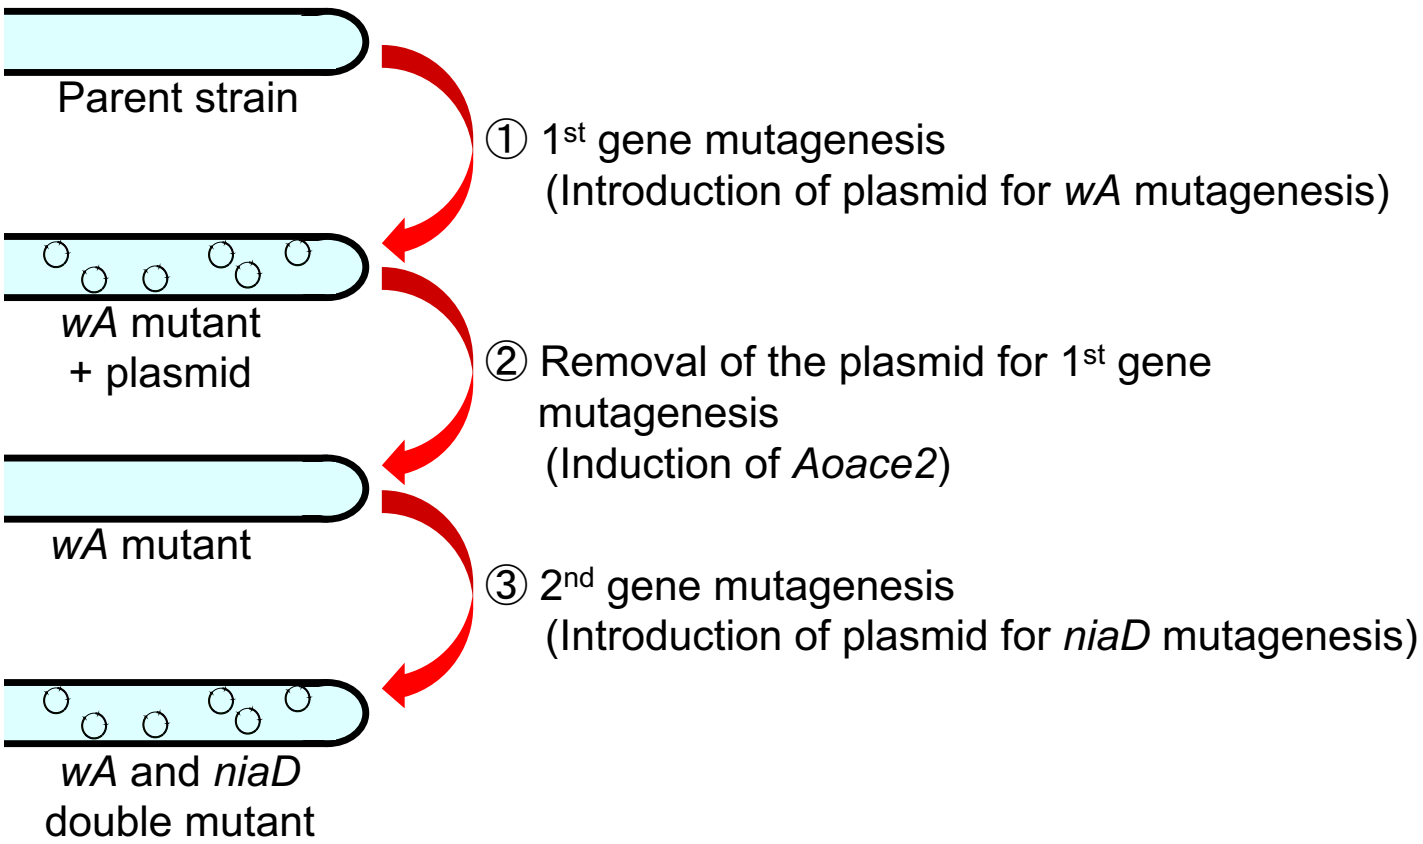

FIG S3 Strategy for the generation of the *wA niaD* double-mutant by genome-editing plasmid recycling. The genome-editing plasmid targeting *wA* is first introduced, for *wA* mutagenesis, under *Aoace2*-repressed condition. Then, the plasmid is removed from the *wA* mutant by inducing *Aoace2*. Finally, the genome-editing plasmid targeting *niaD* is introduced, for *niaD* mutagenesis, resulting in the *wA niaD* double-mutant.

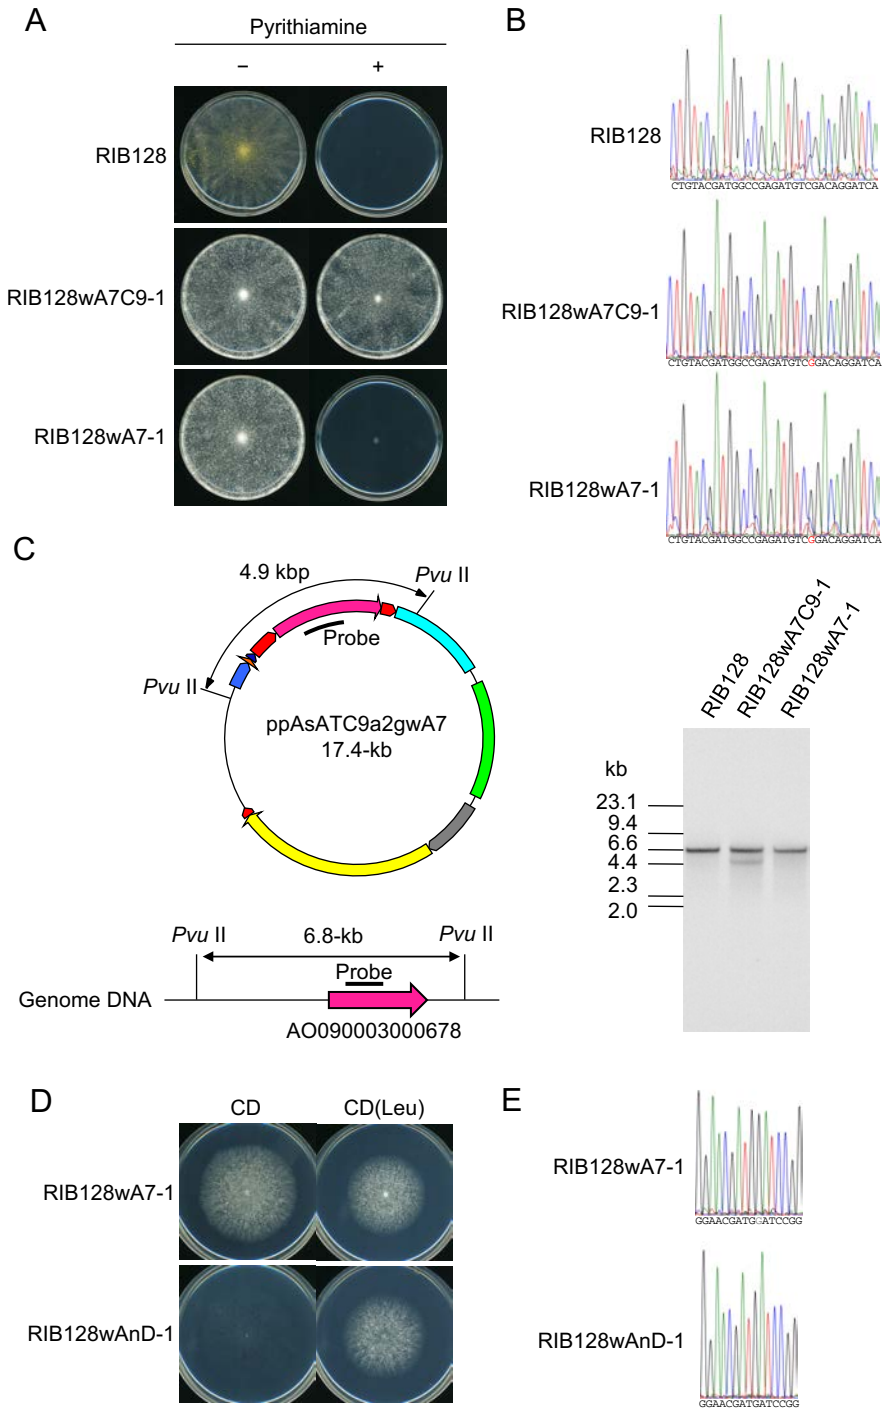

FIG S4 Generation of the *wA niaD* double-mutant of the *A. oryzae* industrial strain RIB128 by recycling of the genome editing-plasmid. (A) Pyrithiamine sensitivity test of transformants before and after plasmid removal. Conidial suspension ( $10^4$  conidia in  $5 \mu\text{L}$ ) of each strain was spotted onto the CD agar medium with (+) or without (-) pyrithiamine, and incubated for 5 d at  $30^\circ\text{C}$ . (B) Nucleotide sequence analysis of the target sequence within the *wA* gene in the indicated strains. Red letters indicate the inserted nucleotides in the *wA* mutants. (C) Southern blot analysis to detect the removal of the genome-editing plasmid. The indicated probe detected 6.8-kb fragment of genomic DNA in the three indicated strains, and 4.9-kb fragment from the genome-editing plasmid in strain RIB128wA7C9-1. (D) Inability to assimilate nitrate by the *wA niaD* double-mutant. Conidial suspension ( $10^4$  conidia in  $5 \mu\text{L}$ ) of each strain was spotted onto the indicated agar medium and incubated for 5 d at  $30^\circ\text{C}$ . (E) Nucleotide sequence analysis of the target sequence within the *niaD* gene in the indicated strains. Gray letter indicates the deleted nucleotide in the *niaD* mutant.

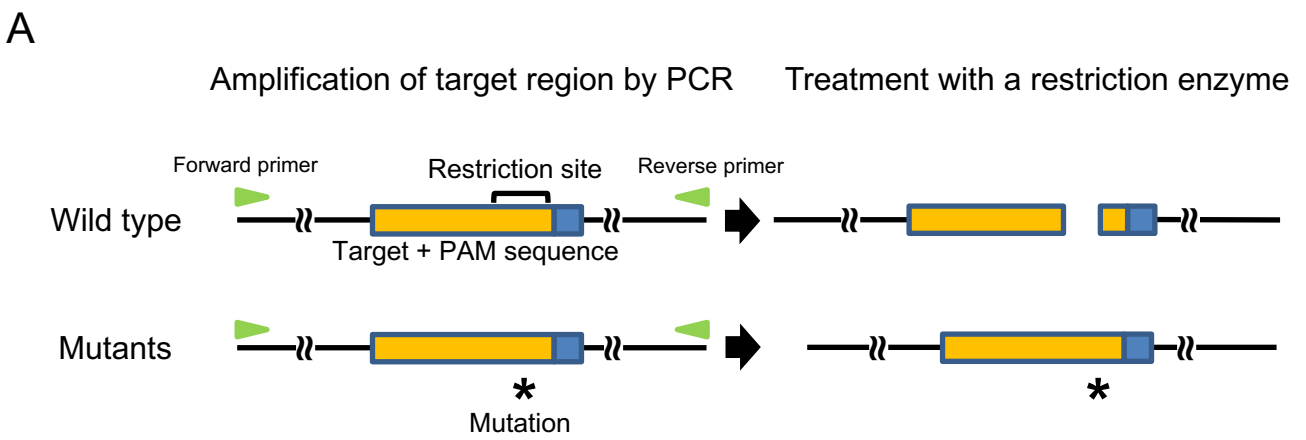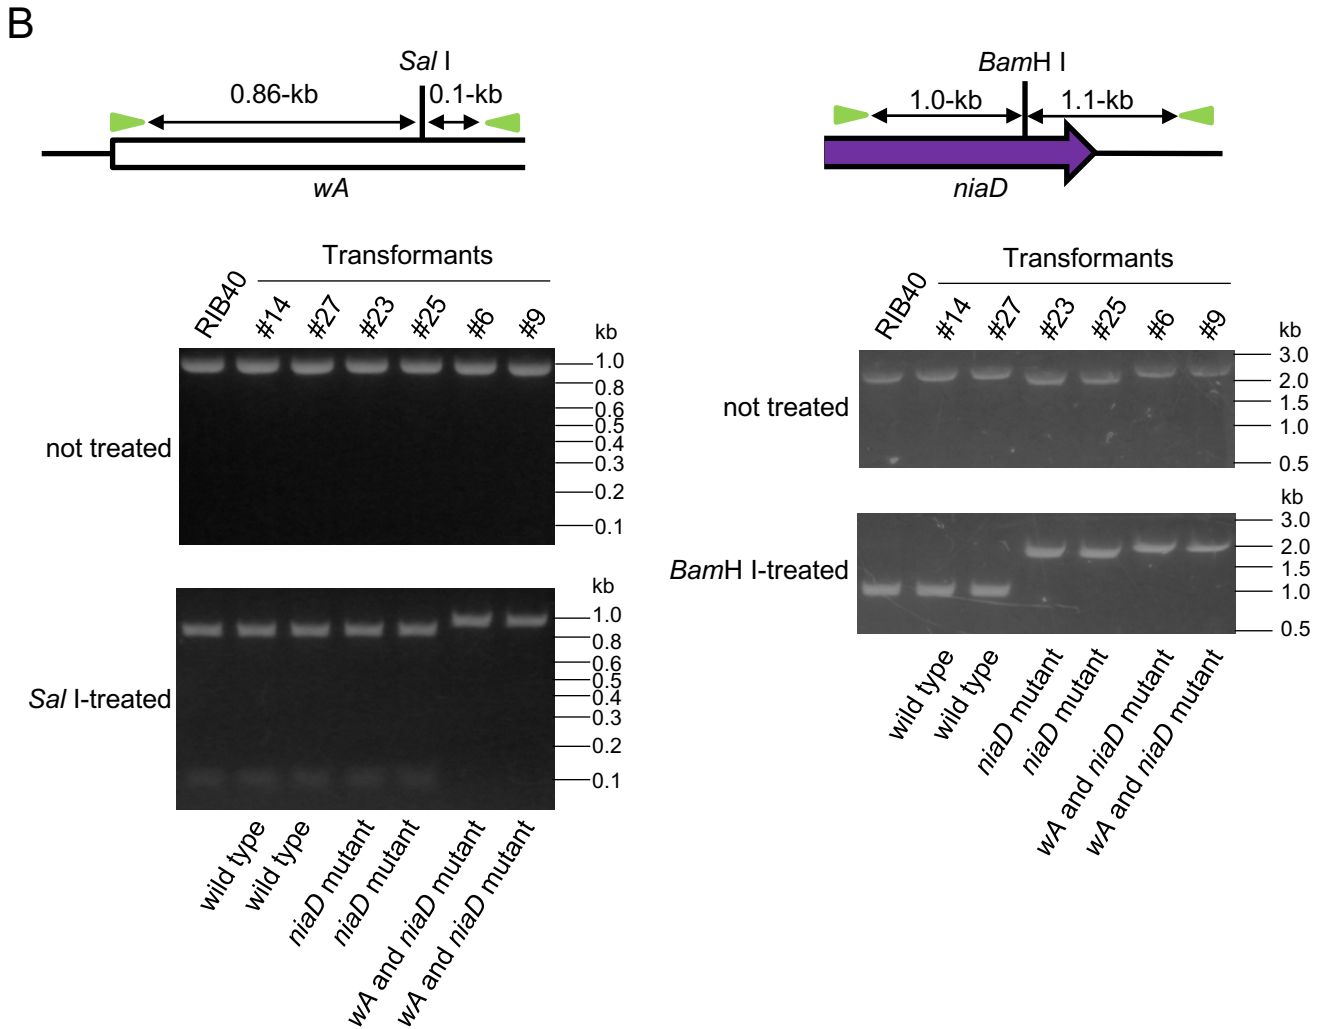

FIG S5 PCR analysis of genomic DNA of transformants generated by double mutagenesis of *wA* and *niaD* (A) Strategy for confirming the mutations by digesting the PCR products from genomic DNA using a restriction enzyme. PCR-amplified products of the wild-type strain, but not those of mutants, are digested using the restriction enzyme. (B) PCR analysis of genomic DNA and digestion analysis of the amplified products using the indicated restriction enzymes.

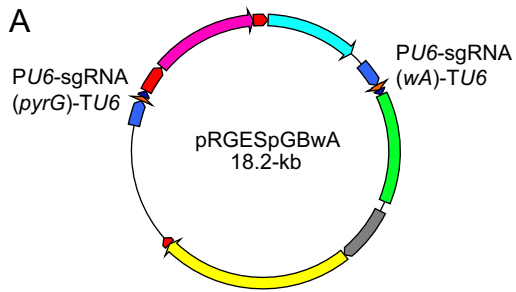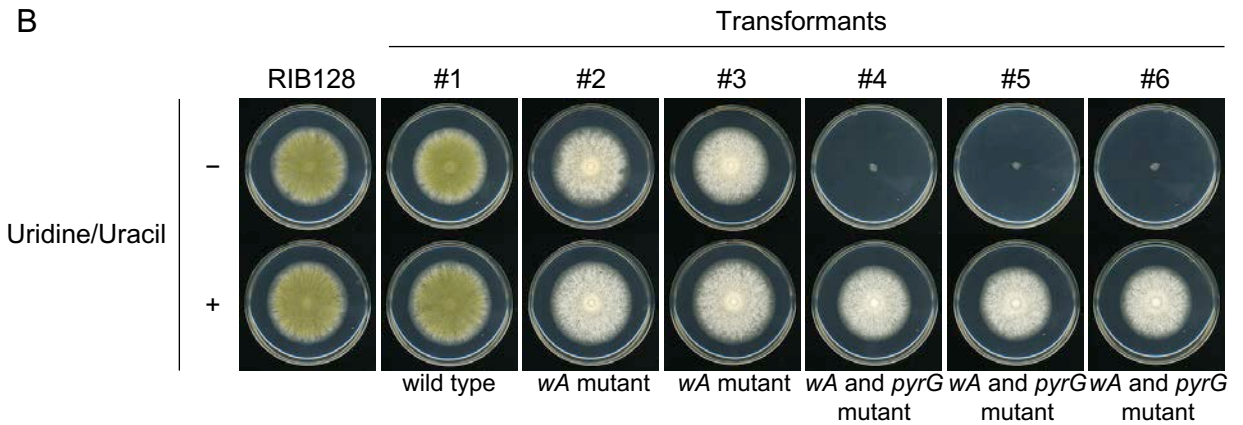

FIG S6 Double mutagenesis of *wA* and *pyrG* in the *A. oryzae* industrial strain RIB128. (A) Plasmid map of pRGESpGBwA for double mutagenesis of *wA* and *niaD*. (B) Conidial suspension ( $10^4$  conidia in 5  $\mu$ L) of each strain was spotted onto the PD agar medium with (+) or without (-) uridine/uracil, and incubated for 4 d at 30°C.

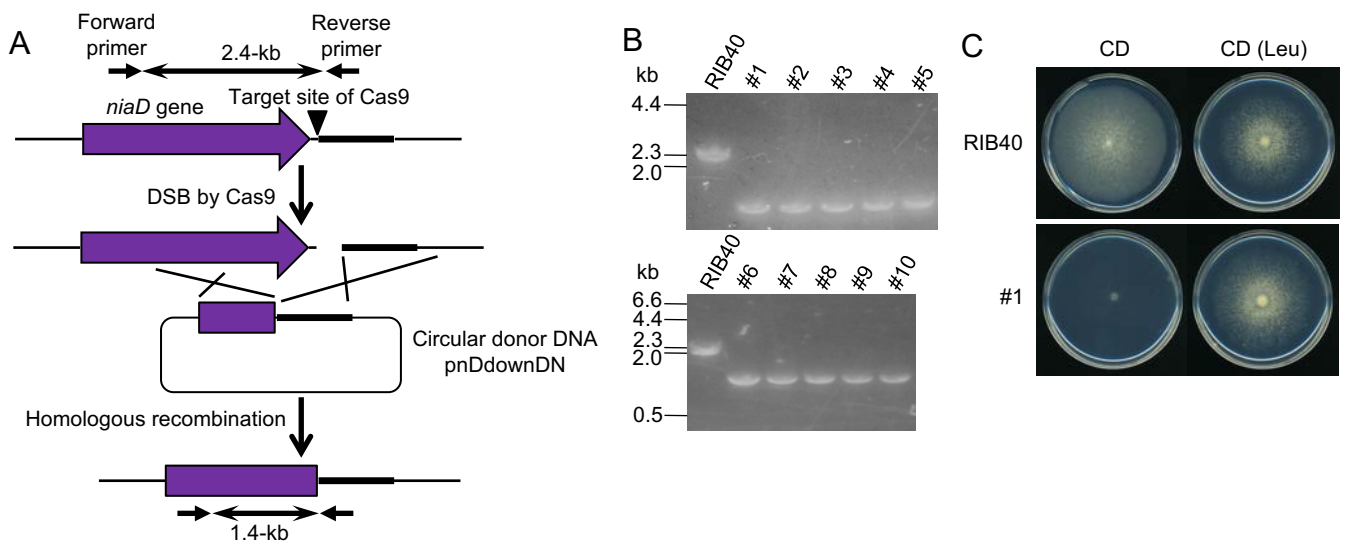

FIG S7 Deletion of *niaD* by co-transformation with the genome-editing plasmid and circular donor DNA. (A) Strategy for deletion of the 3'-region of the *niaD* gene using the CRISPR/Cas9 system. (B) PCR analysis of genomic DNA after partial deletion of *niaD*. (C) Phenotype of transformants resulting from partial deletion of *niaD*. Conidial suspension ( $10^4$  conidia in  $5 \mu\text{L}$ ) of each strain was spotted onto the indicated medium and incubated for 5 d at  $30^\circ\text{C}$ .

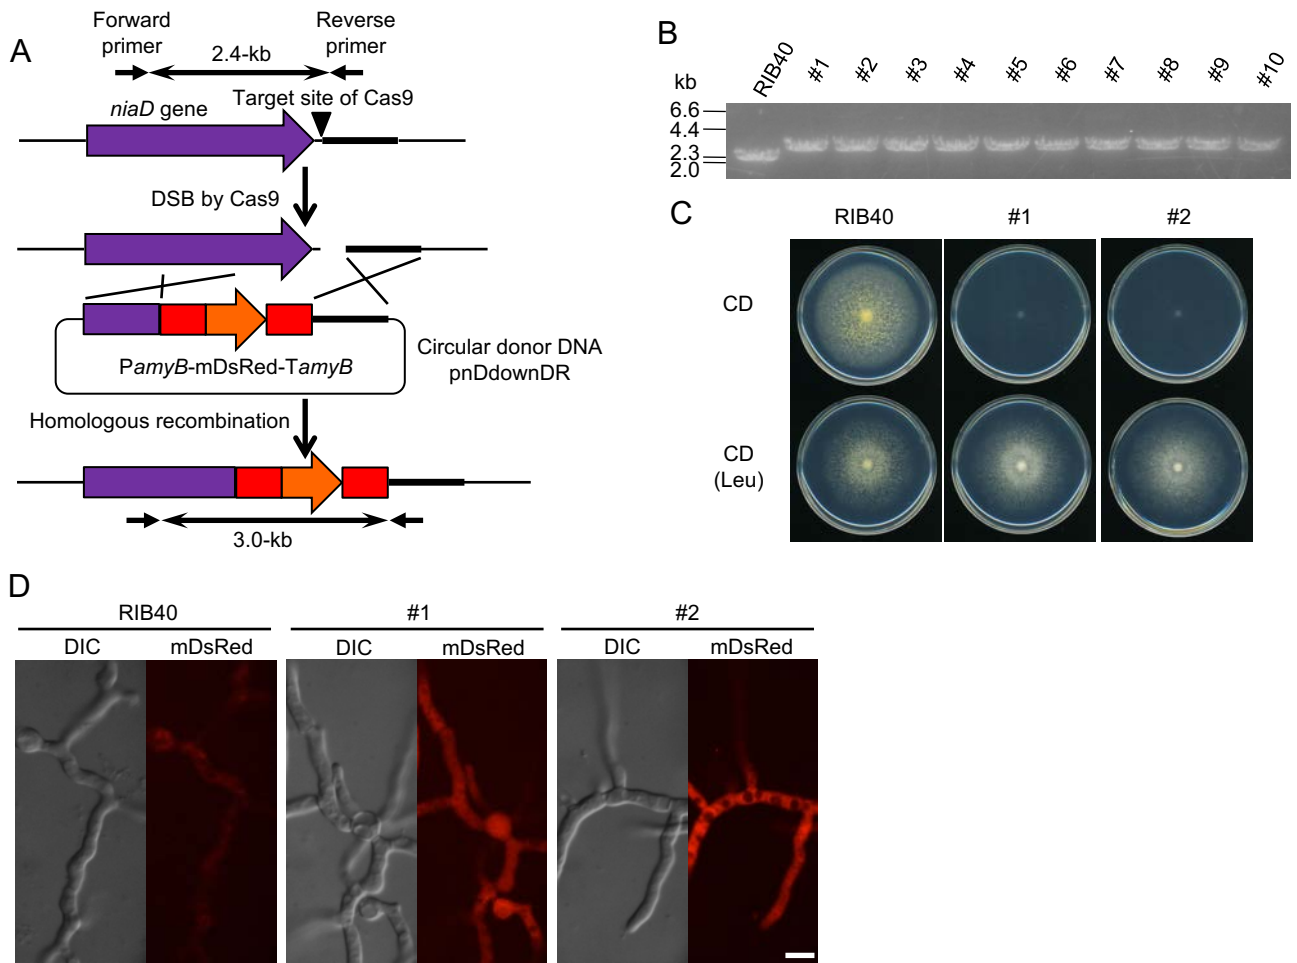

FIG S8 Integration of the mDsRed-expression cassette into the *niaD* locus by co-transformation with the genome-editing plasmid and circular donor DNA. (A) Strategy for integrating the mDsRed-expression cassette into the *wA* locus using the CRISPR/Cas9 system. (B) PCR analysis of genomic DNA after the integration. DNA fragments PCR-amplified using the primers indicated in panel A were analyzed by electrophoresis. (C) Phenotype of transformants resulting from the integration. Conidial suspension ( $10^4$  conidia in  $5 \mu\text{L}$ ) of each strain was spotted onto the indicated medium and incubated for 5 d at  $30^\circ\text{C}$ . (D) Fluorescent microscopic analysis of transformants expressing mDsRed. Bar:  $10 \mu\text{m}$ .

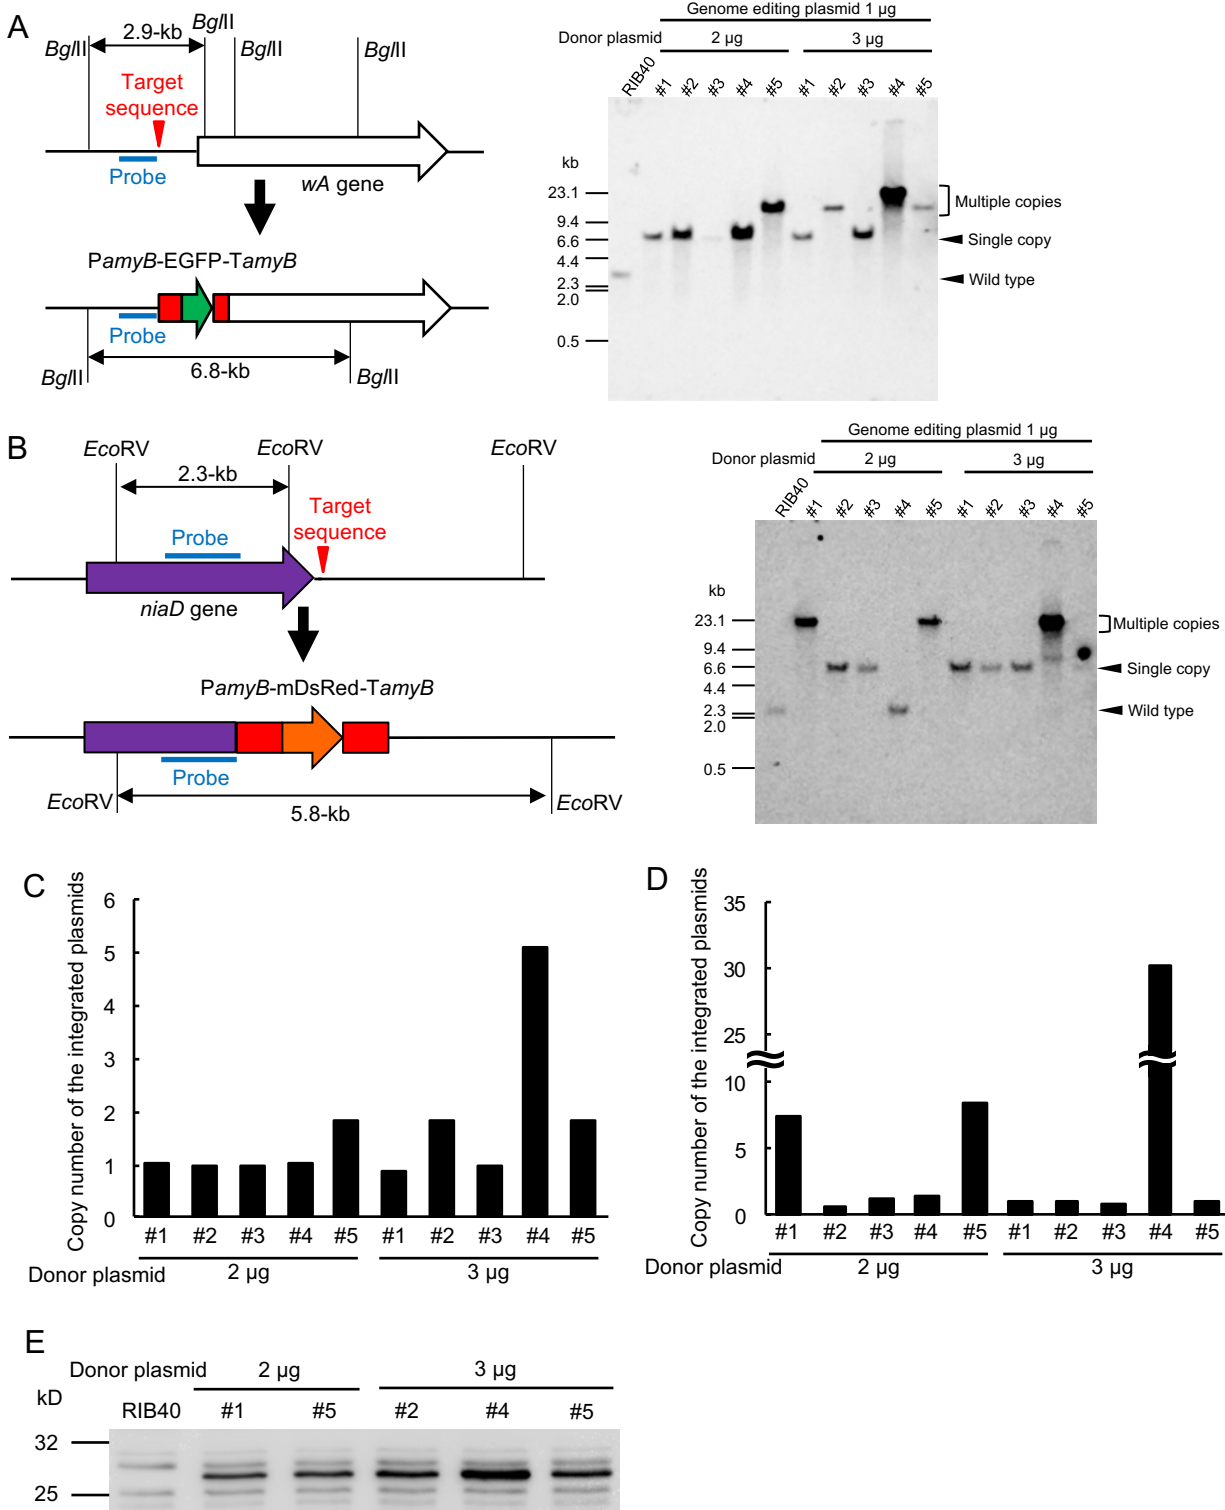

FIG S9 Investigation of the copy number of the integrated donor plasmid. (A, B) Southern blot analysis to confirm the integration of the EGFP-expression cassette into the *wA* locus (A) and the mDsRed-expression cassette into the *niaD* locus (B). As *Bgl*II and *EcoRV* do not digest each donor plasmid, the longer fragments than that indicating single integration indicate multiple integration into the target loci. (C, D) Investigation of the copy number of the integrated donor plasmids including the EGFP-expression cassette (C) and the mDsRed-expression cassette (D) by quantitative PCR. The primers used for quantitative PCR were designed within the DNA sequences indicated as probes in panels A and B. (E) Investigation of production levels of EGFP by Western blot analysis.



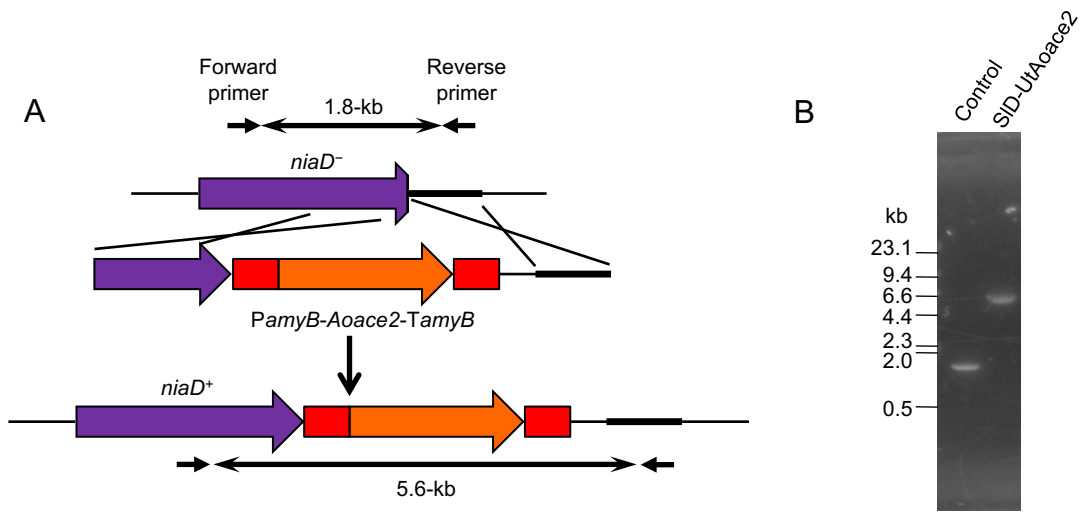

FIG S10 Generation of strains expressing *Aoace2* under the control of *PamyB* downstream of *niaD*. (A) Strategy for the construction of SID-UtAoace2. Arrows indicate the positions of primers used for PCR analysis of genomic DNA. (B) PCR analysis of genomic DNA of strain SID-UtAoace2. Strain NSID1 was used as the control.
